# Supplementary material for: Detailed characterization of the mouse embryonic stem cell transcriptome reveals novel genes and intergenic splicing associated with pluripotency
Source: PubMed Central journal article supplement (PMC2375908; doi:10.1186/1471-2164-9-155), 2008-04-09
Supplement: 1471-2164-9-155-S2.pdf [file 1471-2164-9-155-S2.pdf]

Full-length sequences of all splice isoforms of all the 5 TUs studied and the intergenically spliced transcript found in [11]

>TU4\_i soform\_A

GTACTGAAGTCTCTGGTCTCCACTGGCTGTGGCTTTCCCTGAAGGAAATCCTTAAGATATTTCTGGAAAGGAAGGGCGCTGGGATACCA  
AGGAAGAAGTCCACATCGGAAACAAGCAGTCGAGTGTTTCATCTGGTGCCACTGACTAGAATGTGCGAAGCGCCCAAGCCCCAGTTACCT  
GGCAACACAGAGGATCCAACTGCGGGACACACCCGGAGCCATCGCAGCTCTTCACTGATGATGACCAAGTCATAGTTTGCAGCAAATG  
TTTCCAGTCTCCAGAGCACAAGCAGCATGGGGCATACGGTATCCAAGAAGCTGCTGAGTATTACAGGATGTTACTCCAGGAAACCCTGG  
TTACATTGAGGGAGAAGCGTGATGCAGCTACGAGCTTACTGGCCGAGGAGCAGAGAGAATGGTGACGATTCCAGGAAGAAGAGCAGAGG  
TTTAAAGAGATGATCGAGGCTGAGTATAAGATGCGATTCAGTTACTGACTGAAGAGGAGGAACCTGGCAGCCTACAAAGTTGACCTGAA  
CTTAAATGGACCTAATCCAGACCAGCTGATGAAGTGTGGCACTGAGCTCATGCAGAAGTCCCAAGAAATGCTACAGAGACTTAGTCACC  
TGGGGAGAGAGAACATGGAAAACTGAAGGCGAGTGAAGTCCGGCTTGGTGAGCACCTGCGCAGCCTCCAGACAATGATCACGGACCTC  
GAGAAGAAGTGTGGGAATCTGCCGTTGCACTGCTCCAGAATGCAAAGTGCTATTTAAAAAGGAATGAGTCTATACTGCTTCAGAGCCT  
AGAGCCAGCTCAGATAACAGACCTGAGTTCCTGCCAGATAATCGAAACGAGCCGTGTTCTACTGAGGCTCCAAAGACATATTACTTTGG  
ACCCAGCCACAGCTCACCCCTCCCTAGTCTTATCCGAAGACCTGAGAGGTGGGATCCGAGAGACACCAAAGACTGGGCTGGCCT  
ACAAGGAGATTGGATTTCCGGCGCTTCTGTGTTGGGTGCAGAGAGCTTACCACGGGGAGGCATTATTGGGAGGTGGCTGTGGGACAGGC  
AACCCAATGGCAGGTGGGCATATGTGACTGTACAGAGAGAAAGGGCAACATTCCTGGGGCTTCTGGAGATAAAGTCTTGCTCATGGGGT  
CCATGATGGGGACCGATTGTACCCTCTGGGTCTTTCCCTTTAAGAAAGGTCTGCCTGAGAAACCAATGTACAAAGTTGGAGTCTTC  
CTAGACTGTGAATGTGGGCAAGTATCCTTCTACAACGTGACAGAGCAGTCCCTCATTTACAGTTTCTCTGACCTTACCTTCCGAGGAGC  
CGTTAAACCAATATTTTCTCTTTGTATTCCAAATGGAGGCATGAGTTCAGACTCTCTCACTGTCTGTCTTTCTCAGACTCATCCCTGAA  
ATGCTGCTGATAGCTCTTTATCTTCTGTGTGTGGAACCAAGATCAAAGAGACACAAAAATAAGATCCAGACTTTGTGAACATCACT  
TATGTAATTAATCTAATATAATCCAATAAAGCCATTAGACT

>TU4\_i soform\_B

GTACTGAAGTCTCTGGTCTCCACTGGCTGTGGCTTTCCCTGAAGGAAATCCTTAAGATATTTCTGGAAAGGAAGGGAAGAAGTCCACAT  
CGGAAACAAGCAGTCGAGTGTTCATCTGGTGCCACTGACTAGAATGTGCGAAGCGCCCAAGCCCCAGTTACCTGGCAACACAGAGGATC  
CAAATCGCGGGACACACCCGGAGCCATCGCAGCTCTTCACTGATGATGACCAAGTCATAGTTTGCAGCAAATGTTTCCAGTCTCCAGAG  
CACAAGCAGCATGGGGCATACGGTATCCAAGAAGCTGCTGAGTATTACAGGATGTTACTCCAGGAAACCCTGGTTACATTGAGGGAGAA  
GCGTGATGCAGCTACGAGCTTACTGGCCGAGGAGCAGAGAGAATGGTGACGATTCCAGGAGAAGAGCAGAGGTTTAAAGAGATGATCG  
AGGCTGAGTATAAGATGCGATTCTAGTTACTGACTGAAGAGGAGGAACCTGGCAGCCTACAAAGTTGACCTGAACCTAAATGGACCTAAT  
CCAGACTAGCTGATGAAGTGTGGCACTGAGCTCATGCAGAAGTCCCAAGAAATGCTACAGAGACTTAGTCACCTGGGGAGAGAGAACAT  
GGAAAACTGAAGGCGAGTGAAGTCCGGCTTGGTGAGCACCTGCGCAGCCTCCAGACAATGATCACGGACCTCGAGAAGAAGTGTGGGG  
AATCTGCCGTTGCACTGCTCCAGAATGCAGAGTGTCTATTTAAAAAGGAATGAGTCTATACTGCTTCAGAGCCTAGAGCCAGCTCAGATA  
ACAGACCTGAGTTCCTGCCAGATAATCGAAACGAGCCGTGTTCTACTGAGGCTCCAAAGACATATTACTTTGGACCCAGGCACAGCTCA  
CCCCTCCCTAGTCTTATCCGAAGACCTGAGAAGTGTGGGATCCGAGAGACACCAAAGACTGGGCTGGCACTACAAGGAGATTGGATT  
TCGGCGCTTCTGTGTTGGGTGCAGAGAGCTTACCACGGGGAGGCATTATTGGGAGGTGGCTGTGGGACAGGCAACCCAATGGCAGGTG  
GGCATATGTGACTGTACAGAGAGAAAGGGCAACATTCCTGGGGCTTCTGGAGATAAAGTCTTGCTCATGGGGTCCATGATGGGGACCGA  
TTGTACCCTCTGGGCTTTCCCTTTAAGAAAGGTCTGCCTGAGAAACCAATGTACAAAGTTGGAGTCTTCTAGACTGTGAATGTG  
GGCAAGTATCCTTCTACAACGTGACAGAGCAGTCCCTCATTTACAGTCTTCTGACCTTACCTTCCGAGGAGCCGTTAAACCAATATTT  
TCTCTTCTGATTCCAAATGGAGGCATGAGTTCAGACTCTCTCACTGTCTGTCTTTCTCAGACTCATCCCTGAAATGCTGCTGATAGCTC  
TTTATCTTCTGTGTGTGGAACCAAGATCAAAGAGACACAAAAATAAGATCCAGACTTTGTGAACATCACTTATGTAATTAATCTAA  
TATAATCC

>TU4\_i soform\_C

GTACTGAAGTCTCTGGTCTCCACTGGCTGTGGCTTTCCCTGAAGGAAATCCTTAAGATATTTCTGGAAAGGAAGGGAAGAAGTCCACAT  
CGGAAACAAGCAGTCGAGTGTTCATCTGGTGCCACTGACTAGAATGTGCGAAGCGCCCAAGCCCCAGTTACCTGGCAACACAGAGGATC  
CAAATCGCGGGACACACCCGGAGCCATCGCAGCTCTTCACTGATGATGACCAAGTCATAGTTTGCAGCAAATGTTTCCAGTCTCCAGAG  
CACAAGCAGCATGGGGCATACGGTATCCAAGAAGCTGCTGAGTATTACAGGATGTTACTCCAGGAAACCCTGGTTACATTGAGGGAGAA  
GCGTGATGCAGCTACGAGCTTACTGGCCGAGGAGCAGAGAGAATGGTGACGATTCCAGGAAGAAGAGCAGAGGTTTAAAGAGATGATCG  
AGGCTGAGTATAAGATGCGATTCCAGTTACTGACTGAAGAGGAGGAACCTGGCAGCCTACAAAGTTGACCTGAACCTAAATGGACCTAAT  
CCAGACCAGCTGATGAAGTGTGGCACTGAGCTCATGCAGAAGTCCCAAGAAATGCTACAGAATGCAAAGTACTATTAAAAAGGAATGA  
GTCTATACTGCTTCAGAGCCTAGAGCCAGCTCAGATAACAGACCTGAGTTCCTGCCAGATAATCGAAACGAGCCGTGTTCTACTGAGGC  
TCCAAAGACATATTACTTTGGACCCAGGCACAGCTCACCCCTCCCTAGTCTTATCCGAAGACCTGAGAAGTGTGGGATTCCGAGAGACA  
CCAAAGACTGGGCTGGCACTACAAGGAGATTGGATTTCCGGCGCTTCTGTGTTGGGTGCAGAGAGCTTACCACGGGGAGGCATTATTG  
GGAGGTGGCTGTGGGACAGGCAACCCAATGGCAGGTGGGCATATGTGACTGTACAGAGAGAAAGGGCAACATTCCTGGGGCTTCTGGAG  
ATAAAGTCTTGCTCATGGGGTCCATGATGGGGACCGATTGTACCCTCTGGGCTTTCCCTTTAAGAAAGGTCTGCCTGAGAAACCAA  
ATGTACAAAGTTGGAGTCTTCTAGACTGTGAATGTGGGCAAGTATCCTTCTACAACGTGACAGAGCAGTCCCTCATTTACAGTCTTCTC  
TGACCTTACCTTCCGAGGAGCCGTTAAACCAATATTTTCTCTTTGTATTCCAAATGGAGGCATGAGTTCAGACTCTCTCACTGTCTGTC  
TTTCTCAGACTCATCCCTGAAATGCTGCTGATAGCTCTTTATCTTCTGTGTGTGGAACCAAGATCAAAGAGACACAAAAATAAGAT  
CCAGACTTTGTGAACATCACTTATGTAATTAATCTAATATAATCCAATAAAGCCATTAGACT

>TU7\_i soform\_A

TAGTTCATGCTGTAGCTGAGGATGCTGGAGTGGTTTGTGTGCTGCTTTGTATGCTACTGCTGGGTGCTGTGAGGGGAATTCAGGCG  
AGCTCTGACCTCGCGACATGCCTTCTATGTTTGAAGAGAATCAGAGCTACACTGAGGAGCCTGTAAGACCTTCTGCATGAAAATGATGC  
ATTGACCTTTGATGATGTGCATGTACACTTCACTCGGGAGGAGTGGTCTTGGTGGATCCATCTCAGAAGAGACTTTACAAAGATGTCA  
TGCTGGAGAAGTACAGGAATCTCACCCTATAGGCTACAATTTGAAAGATCATAACATTGAAGAACATTCTCAAATGATAGAAGATAC  
GGAAGGCACAAAACTCACTCTGTGGAGAGAAACCCTATGAATATACAAATGGGATAAAGCCTTCAAATATCACAGTCACTTTCAAAA  
GCTTGAAGAAACCAACTGGAGACAAAACTCGGAAGTCTTTCAACATAGTAAAGTCTTACATGTCAAAGTACTCTCAAAGAAATA  
AAAGAACAGATACTAGAGAGAAACCCTACAAATGAATGAATGTGATAAAGCCTTTTTAAAGCTCAAGTATCTTCGACTACATGAAAGA  
ATATATTCTGGGAAGAAACCCTATGAATGAATCAATGTGGTAAAGCCTTTTTACATCCCAGCTATCTTGAATGCATGAAAGAACACA  
TACTGGAGAGAAACCTTACCAATGAATCAATGTGGCAAGCCTTTACACGAAGGAGTCACTTCAAAGCCATAAAGTGTACATACTG  
GAGAGAGACCCTACATATGTAATCAGTGAATAAAGCCTATCCACGCAAGAGTGTCTCCGAAACATGAAAGAACACATACTGGAGAG

AAACCTTACAAATGTGATCAGTGTGGTAAGGCCTTTACACAGAGCAGTCATCTTAAAACCCATAAAGTAATACATACTGGAGGGAGACT  
CTAAATATGTAATCAGTGTGATGAAAGCCTATTCACACCCGAGTCATCTTCCAAAACATGAAAGAACACATACTGGAGAGAAACCTTATA  
AATAAATCAGTGTGATCAAGTCATTTATATCTCACAGTCATCAAGTCATGAAAGAATTTATACTGGATAGAAACCTACAAATGTA  
ATGAATGTGATAAAGCCTTTTTCACAGCCAGGTATCTTCAATACATGAAAGAACACATACGGGAGAGAAACCTTACAAATGTTATCAG  
TGTGATAAAGCCTTTCCACAAGGCAATAATCTCAAAGTACATAACAAGGAGGCATATTGGAGATATCCCTATGAATGAAATCAATGTGGT  
AAAGCCTTTGTATATGACTAATCTTTTGGGATCCATAAAAAGAACAGATAATGGAGACTGGAGAGAAACATTACCAACATAATCAATGTG  
GTAAAGCCTTTGCAGAAAGCAGTCATCTTCAAACCCATAAAGTACTACATACTGGAGTGTAACTCC

>TU7\_i soform\_B

TAGTTCATGCTGTAGCTGAGGATGCTGGAGTGGTTTTGTGTGCTCTGCTTTGTATGCTACTGCTGGGTGCTGTGAGGGGAATTCAGGCG  
AGCTCTGACCTCGCGACATGGATGCATTGACCTTTGATGATGTGCATGTACACTTCACTCGGGAGGAGTGGTCTTTGCTGGATCCATCT  
CAGAAGAGACTTTACAAAGATGTGATGCTGGAGAACTACAGGAATCTCACCCTATAGGCTACAATTGGAAAGATCATAACATTGGAGA  
ACATTCTCAAATGATAGAAGATACGGAAGGCACAAAATCACTCCTGCTGGAGAGAAACCTATGAATATACACAATGGGATAAAGCCT  
TCAAATATCACAGTCATCTTCAAAGCTTCAAAGAACCCTGAGAGACAAAACCTCGGAAGTCTTTCAACATAGTAAAGTGCTTACA  
TGTCAAAGTACTCTCAAAGAATAAAAAGAACAGATACTAGAGAGAAACCTACAAATGTAATGAATGTGATAAAGCCTTTTTAAAGCT  
CAAGTATCTTCGACTACATGAAAGAATATATTTCTGGGAAGAAACCTATGAATGTAATCAATGTGGTAAAGCCTTTTTACATCCAGCT  
ATCTTGAATGCATGAAAGAACACATAACGGAGAGAAACCTTACCAATGTAATCAATGTGGCAAAGCCTTTACACGAAGGAGTCATCTT  
CAAAGCCATAAAGTAGTACATACTGGAGAGAGACCCTACATATGTAATCAGTGTAAAGCCTATCCACGCAAGAGTTGTCTCGAAA  
ACATGAAAGAACACATACTGGAGAGAAACCTTACAAATGTGATCAGTGTGGTAAGGCCTTTACACAAAGCAGTCATCTTAAAACCCATA  
AAGTAATACATACTGGAGGGAGACTCTAAATATGTAATCAGTGTGATGAAGCCTATTCACACCCGAGTCATCTTCCAAAACATGAAGGA  
ACACATACTGGAGAGAAACCTTATAAATAAATCAGTGTGATAAGTCATTTATATCTCACAGTCATCAAGTCATGAAAGAATTTAT  
ACTGGATGAAACCTTACAAATGTAATGAATGTGATAAAGCCTTTTTCACAGCCAGGTATCTTGAATACATGAAAGAACACATACGGG  
AGAGAAACCTTACAAATGTTATCAGTGTGATAAAGCCTTTCCACAAGGCAATAATCTCAAAGTACATAACAAGGAGGCATATTGGAGATA  
TCCCTATGAATGAAATCAATGTGGTAAAGCCTTTGTATATGACTAATCTTTTGGGATCCATAAAAAGAACAGATAATGGAGACTGGAGAG  
AAACATTACCAACATAATCAATGTGGTAAAGCCTTTGCAGAAAGCAGTCATCTTCAAACCCATAAAGTACTACATACTGGAGTGTAACT  
TCCC

>TU11\_i soform\_A

GCGGAAGCAAGTGAGAGATTTTCGACCAGTTACCTTACTCTGGTTCTCCTACCTCCCTCTTCATCAGCGAGATTCAAGGCTGGACCAGGG  
CCCCCAGGGAAAAAATCCTGCTATCAAGGAAGGAAATATAGGACCAGGACCTTCCCATGGACCCTTCTCAGGACGTTCCAACAGCACAA  
GCAAGGGTGTCTCCCTAAGACACAAGAGGCCTGAAAACACTATCCTTTGTGAAGTGCCATGGTGGTCAGGAAAAGCAGAGCCACAGCTC  
CCAGACTAAGCAAGCCTGGCCCCACAGGTACCTCACTTGGATCCCAGTGGGCGGGGCATCCCCACGTCCCCGCGCCATTAAGCCCAGGT  
GGTGGACTCTACCAAGGCAGCGCCGGGGCAGAAGCGAAGGCCAGGCGGGGAGCTGAAGAATGCGCAGGCGGGAGCCACGAGGCGGGC  
GCGCCCCCTTTCAGCGCTTCCGGCGGGCGGGCGGTTCCGGGGCGGGCGCGCGCCGCGGACGGGACCGTTGGTGTTCGCTTGGCCGTAGT  
GGACTGGGCGGTGGACACCATGCAGCTGACCGTGAAGGCGCTCCAGGGCGGGGAATGTAGCCTACAGGTGGCGGAGGACGAGCTAGTGT  
CTACACTGAAGCACCTGGTCTCGGATAAGCCGAATGTCCCTGTGCGCCAGCAACGTCTGCTGTTCAAGGGCAAGGCCCTAGCAGATGAA  
AAACGACTGTGAGATTACAACATTTGGGCCAATTCTAAGCTCAACCTAGTTGTAAGCCTTTGGAGAAGGTGCTACTGGAAGAAGGGTC  
TGCCACAGACTGGTGCAGTCCCCAGCCACCCCATCTGGCAGCTGATCTCAAAGTCTGGCCCGTCACTTCAGTGTAGCAGATGCCA  
GCAGGGTCTGGAACAACACAGAGGGATTATGACAGGTCCTTGAGCCGCCTAACACTGGATGACATCGAACGTTTGGCCAGCCGCTTT  
CTACACTCTGAAGTGACTGAGGCTATGGAAAAAGGGTTCTGCAAAATAGCATTCTGGGAT

>TU11\_i soform\_B

GCGGAAGCAAGTGAGAGATTTTCGACCAGTTACCTTACTCTGGTTTTCTGCCTCCCTCTTCATCAGCGAGATTCAAGGCTGGACCAGGG  
CCCCCAGGGAAAAAATCCTGCTATCAAGGAAGAAAAATATAGGACCAGGACCTTCCCATGGACCCTTCTCAGGACATTTCCAACAGCACAA  
GCAAGGGTGTCTCCCTAAGACACAAGAGGCCTGAAAACACTATCCTTTGTGAAGTGCCATGGTGGTCAGGAAAAGCAGAGGTACCTCAC  
TTGGATCCCAGTGGGCGGGGCATCCCCACGTCCCCGCGCCATTAAGCCCAGGTGGTGGACTCTACCAAGGCACGGCCGGGGCAGAAGC  
GAAGGCCGGGAGGCGGGACTGAAGAATGCGCAGGCGGGAGCCACGAGGCGGGCGCGCCCTTTTCAGCGCTTCCGGCGGGCGGGCGGT  
TCCGGGGCGGGCGGGCGGGCAGGGGACCGTTGGTGTTCGCTTGGCCGTAGTGGACTGGGCGGTGGACACCATGCAGCTGACCGTGAA  
GGCGCTCCAGGGCGGGGAATGTAGCCTACAGGTGGCGGAGGACGAGCTAGTGTCTACACTGAAGCACCTGGTCTCGGATAAGCTGAATG  
TCCCTGTGCGCCAGCAAGCTGTCTGTTCAAGGGCAAGGCCCTAGCAGATGAAAACACTGTGAGATTACAACATTTGGCCCAATTT  
AAGCTCAACCTAGTTGTTAAGCCTTTGGAGAAGGTGCTACTGGAAGAAGGTTCTGCCACAGACTGGTGCAGTCCCCAGCCACCTTCT  
CTGGCAGCTGATCTCAAAGTCTGGCCCGTCACTTCAGTGTAGCAGATGCCAGCAGGGTCTGGAACAACACAGAGGGATTATGACA  
GGTCTTGGCCGCCTAACACTGGATGACATCGAACGTTTGGCCAGCCGCTTTCTACACTCTGAAGTGACTGAGGCTATGGAAAAAGGG  
TTCTGCAAAATAGCATTCTGGGAT

>TU11\_i soform\_C

GCGGAAGCAAGTGAGAGATTTTCGACCAGTTACCTTACTCTGGTTTTCTGCCTCCCTCTTCATCAGCGAGATTCAAGGCTGGACCAGGG  
CCCCCAGGGAAAAAATCCTGCTATCAAGGAAGAAAAATATAGGACCAGGACCTTCCCATGGACCCTTCTCAGGACATTTCCAACAGCACAA  
GCAAGGGTGTCTCCCTAAGACACAAGAGGCCTGAAAACACTATCCTTTGTGAAGTACCATGGATGTGAGGAAAAGCAGAGCCACAGCTC  
CCAGACTAAGCAAGCCTGGCCCCACAGGTACCTCACTTGGATCCCAGTGGGCGGGGCATCCCCACGTCCCCGCGCCATTAAGCCCAGGT  
GGTGGACTCTACCAAGGCAGCGCCGGGGCAGAAGCGAAGGCCAGGCGGGGAGCTGAAGAATGCGCAGGCGGGAGCCACGAGGCGGGC  
GCGCCCCCTTTCAGCGCTTCCGGCGGGCGGGCGGTTCCGGGGCGGGCGGGCGGGCAGGGGACCGTTGGTGTTCGCTTGGCCGTAGT  
GGACTGGGCGGTGGACACCATGCAGCTGACCGTGAAGGCGCTCCAGGGCGGGGAATGTAGCCTACAGGTGGCGGAGGACGAGCTAGTGT  
CTACACTGAAGCACCTGGTCTCGGATAAGCTGAATGTCCCTGTGCGCCAGCAACGTCTGCTGTTCAAGGGCAAGGCCCTAGCAGGATTA  
TGACAGGTCCTTGGCCGCCTAACACTGGATGACATCGAACGTTTGGCCAGCCGCTTTCTACACCCTGAAGTGACTGAGGCTATGGAAA  
AAGGGTTCTGCAAAATAGCATTCTGGGAT

>Cl k2-Scamp3\_publ i shed\_transcri pt

GTGGAACCGCACTTCGTCGCGCGGGGGTGCCTGGGACTCCGGCCGAGTGCCTGCGCCATCACGGACTTCTGTGGGACAAGCGCACGG  
GCCTCGCCGCGAGAAGCATGCCCATCCCCGAAGGTACCATTCTCAGAGCGAGGTAGCCGGGGGAGTTACCACGAACACTATCAGAGC  
CGAAAGCATAAGCGAAGAAGAAGTCGCTCCTGGTCAAGTAGCAGTGACCGGACAAGGCGGGCGGGAGGGAGGACAGCTACCACGTTCCG  
GTCCCGAAGCAGCTATGATGACCATTCTCGGATCGGCGGCTGTACGATCGGCGGTAAGTGTGGCAGCTACAGGCGCAATGACTACAGCC

GGGACAGAGGGGAGGCTTACTACGACACAGACTTTTCGGCAGTCTATGAATACCATCGAGAGAACAGCAGTTACCGAAGCCAGCGCAGC  
AGCCGAAGGAAACACAGAAGGCCGGAGGAGACGGAGCCGGACATTCAGCCGCTCATCTTACAGCACAGCAGCCGGAGAGCCAAGAGTGT  
AGAGGACGACGCTGAGGGCCACCTCATCTACCACCTCGGGGACTGGCTACAAGAGCGATGAATTTGAAGCACCTTAGGAGAAGGGA  
CCTTCGGCCGATGTTGTCAGTGTGTGGACCATCGCAGGGGCGAACAAGTTGCCCTGAAGATCATTAAAGAATGTGGAGAAGTACAAG  
GAAGCAGCCCCGACTAGAAATCAACGTGCTGGAGAAAATCAATGAGAAAGATCCTGACAACAAGAACCTCTGTGTCCAGATGTTTGACTG  
GTTTTGACTACCATGGCCACATGTGTATCTCCTTTGAGCTTCTGGGCCTTAGCACCTTCGATTTCTCAAAGACAACAACACTACCTGCCCT  
ACCCCATCCACCAAGTGCGCCACATGGCCTTCAGCTCTGCCAGGCCGTCAAGTTCTCCATGATAACAAGTTGACACATACGGACCTC  
AAACCTGAAAATATTCTGTTTGTGAATTCAGACTACGAACCTACCTACAACCTAGAGAAGAAGCGAGATGAGCGCAGTGTAAAGAGCAC  
AGCCGTGCGGGTGGTGGACTTCGGCAGTGCCACCTTTGACCACGAACACCATAGCACCTTTGCTCCACTCGCCATTACCGAGCCCCCG  
AGGTCATCCTGGAGTTGGGCTGGTACAGCCATGCGATGTATGGAGCATAGGCTGCATCATCTTTGAGTACTACGTTGGCTTACCCTC  
TTCCAGACCCATGACAACAGAGAGCATCTGGCCATGATGGAAGGATCCTGGGCTCTGTCCCTTCTCGGATGATCAGAAAGACAAGAAA  
ACAGAAATATTTTTATCGGGTGCCTGGATTGGGATGAGAACACCTCAGCCGGGCGCTACGTTCTGAGAAGTCAAACCTCTGCGGG  
ACCCAGCTGTGATCCAGCACCGACCCAGCCAGCAGTATGCCACGCTGGACGTCTACAACCCCTTTGAGAACCAGAGAGCCCCACCAGCC  
TACGAGCCTCCTGCTCCAGCCCCAGCACCTCTACCGCCACCCTCAGTCCCTCTGTACAGTCTCAAGAAAGCTCAGCCCCACAGAGCC  
CAGGAACCTACGGCTCTACAGCACCCAGGCCCTCAGTGCAGCGGCCACTGCTGAGTCTGAAGAAGCAGGAGGAACCTCAACCCGAAGG  
CAGAGAGTGTGGACCGGGAGCGAGAAGTGCAGCATGTCCGCTGGGTGGTGCAGGCACTCGACAGAACAACCTGGCCTCCCTACCCG  
TCTTTTTGCCCTGTAAAGCCTTGCTTTTTCCAAGACATCTCTATGGAGATACCCCAAGAATTTCAGAAGACGGTGTCCACCATGTACTA  
CCTCTGGATGTGCAGCACTCTGGCTCTTCTCCTGAACCTTCTCGCCTGCCTGGCCAGGTTCTGTGTGGACACCGGCAGTGGCTCAGGCT  
TTGGGCTGTCTATGCTCTGGCTGCTCCTTTTCACTCCCTGCTCCTTTGTCTGCTGGTACCGCCCGATGTATAAGGCTTTCCGGAGTGAT  
AGTTCATTCAATTTCTCGTTTTTTTTCTTCATTTTCTTCGTCCAGGATGTGTTCTTTGTCTCCAGGCCATTGGCATCCCAGGGTGGG  
CTTCAGCGGCTGGGTACTGCTCTGGTGGTGGTGGATCCAAACCTGCCGTGGCGGTGCTCATGCTGCTCGCCCTGCTCTTACC  
GCATCGCAGTGTGGGAATCGTGATGCTGAAGCGGATCCACTCCCTGTACCGCCAAACGGGTGCCAGCTTTCAGAAGGCCAGCAAGA  
TTTTGCTGCTGGTGTCTTCTCCAACCCTGCGGTTTGAAGTGTGCTGCCAATGCAGCTGCCGGAGCTGCTGAAAATGCCTTCAGGGCCCC  
TTGACCCCTGCTGCACCCGCTGGGATGCCCTGGGCTGTCACTGTGGAAACCAAGATAGTCCCTATCCCTGAAGTCTCTGGGATTCAG  
GGAGCCATCACCCTTGGTGACTTCTATGGGGCTCTTATTCCACAGCCATGACTTTAATCCTGACTTGAGGTGTGGAGAGCCCGCTGT  
GACTCAGTCATTATTTGCCTTTTATCTCCCATCTGGCCACACTGCTGCCGCCACCTCTCACACAACCCCAACCCAGTTTCTTCTGCT  
GTGCCAAGGATGTCTTC

>TU52\_i soform\_A

GTGGAACCGCACTTCGTGCGCCGCGGGGGTGCCGGGACTCCGGCCGCACTGCCGCCGCGATGCCGCCGCCATCACGGACTTCCTGTGGGACAAGCGCACGG  
GCCTCGCCGCCAGAACGATGCCCCATCCCCGAAGGTACCATTCCTCAGAGCGAGGTAGCCGGGGGAGTTACCACGAACACTATCAGAGC  
CGAAAGCATAAGCGAAGAAGAAGTTCGCTCCTGGTCAAGTAGCAGTGACCGGACAAGGCCGGCGGGAGGAGGACAGCTACCACGTTTCG  
GTCCCGAAGCAGTATGATGACCATTCGTCCGATCGGCGGCTGTACGATCGGCGGTACTGTGGCAGCTACAGGCGCAATGGCTACAGCC  
GGGACAGAGGGGAGGCTTACTACGACACAGACTTTTCGGCAGTCTATGAATACCATCGAGAGAACAGCAGTTACCGAAGCCAGCGCAGC  
AGCCGAAGGAAACACAGAAGGCCGGAGGAGACGGAGCCGGACATTCAGCCGCTCATCTTCAATGAAATTTGAAGCACCTTAGGAGAAGGG  
ACCTTCGGCCGAGTTGTGCAGTGTGTGGACCGTGCAGGGGCGGAACACAGAGTTGCCCTGAAGATCATTAAAGAATGTGGAGAAGTACAA  
GGAAGCAGCCCGACTAGAAATCAACGTGCTGGAGAAAATCAATGAGAAAGATCCTGACAACAAGAACCTCTGTGTCCAGATGTTTGACT  
GGTTTGACTACCATGGCCACATGTGTATCTCCTTTGAGCTTCTGGGCCTTAGCACCTTCGATTTCTCAAAGACAACAACACTACCTGCC  
TACCCATCCCAAGTGCGCCACATGGCCTTCAGCTCTGCCAGGCCGTCAAGTTCTCCATGATAACAAGTTGACACATACGGACCT  
CAAACCTGAAAATATTCTGTTTGTGAATTCAGACTACGAACCTACCTACAACCTAGAGAAGAAGCGAGATGAGCGCAGTGTAAAGAGCA  
CAGCCGTGCCGGTGGTGGACTTCGGCAGTGCACCTTTGACCACGAACACCATAGCACCTTTGCTCCACTCGCCATTACCGAGCCCCA  
GAGGTATCCTGGAGTTGGGCTGGTACAGCCCTGCGATGTATGGAGCATAGGCTGCATCATCTTTGAGTACTACGTTGGCTTACCCT  
CTTCCAGACCCATGACAACAGAGAGCATCTAGCCATGATGGAAGGATCCTGGGTCTGTCCCTTCTCGGATGATCAGAAAGACAAGAA  
AACAGAAATATTTTTATCGGGTGCCTGGATTGGGATGAGAACACCTCAGCCGGGCGCTACGTTCTGTGAGAAGTCAAACCTCTGCGG  
GACCCATGATGATCCAGCACCCAGCCAGCAGTATGCCACGCTGACGTTACAACCCCTTTGAGAACCAGAGAGCCCCACCAGC  
CTACGAGCCTCCTGCTCCAGCCCCAGCACCTCTACCGCCACCCTCAGCTCCCTCTGTACAGTCTCAAGAAAGCTCAGCCCCACAGAGC  
CCAGGAACCTACGGCTCCTACAGCACCCAGGCCTCAGCTGCAGCGGCCACTGCTGAGTCTGTGAAGAAGCAGGAGGAACCTCAACCGCAAG  
GCAGGGGAGTTGGACCGCCGGGAGCGAGAAGTGCAGCATGTCCGCTGGGTGGTGCAGGCACTCGACAGAACAACCTGGCCTCCCCTACC  
GTCTTTTTGCCCTGTAAAGCCTTGCTTTTTCCAAGACATCTCTATGGAGATACCCCAAGAATTTCAGAAGACGGTGTCCACCATTGACT  
ACCTCTGGATGTGCAGCACTCTGGCTTCTTCTGACTTCTTCTGCCTGCCTGGCCAGGTTCTGTGTGGACACCGGCAGTGGCTCAGC  
TTTTGGCTGTCTATGCTCTGGCTGCTCCTTTTCACTCCCTGCTCCTTTGTCTGTAGTACCGCCGATGATAAGGCTTTCCGGATGA  
TAGTTTATTCAATTTCTTCGTTTTTTTTCTTCATTTTCTTCGTCCAGGATGTGTTCTTTGTCTCCAGGCCATTGGCATCCCAGGGTGGG  
GCTTCAGCGGCTGGGTGACTGCTCTGGTGGTGGTGGGATCCAAACCTGCCGTGGCGGTGCTCATGCTGCTCGTCCGCTGCTCTTACC  
GGCATCGCAGTGTGGGAATCGTGATGCTGAAGCGGATCCACTCCCTGTACCGCCAAACGGGTGCCAGCTTTCAGAAGGCCAGCAAGA  
ATTTGCTGCTGGTGTCTTCTCCAACCCTGCGGTTTGAAGTGTGCTGCCAATGCAGCTGCCGGAGCTGCTGAAAATGCCTTCAGGGCCC  
CTTGACCCCTGCTGCACCCGCTGGGATGCCCTGGGCTGTCACTGTGGAAACCAAGATAGTCCCTATCCCTGAAGTCTCTGGGATTCAG  
GGGACCCATCACCCTTGGTGACTTCTATGGGGCTCTTATTCCACAGCCATGACTTTAATCCTGACTTGAGGTGTGGAGAGCCCGCTGT  
TGACTCAGTCATTATTTGCCTTTTATCTCCCATCTGGCCACACTGCTGCCGCCACCTCTCACACAACCCCAACCCAGTTTCTTCTGCT  
TGTGCCAAGGATGTCTTC

>TU52\_i soform\_B

GTGGAACCGCACTTCGTGCGCCGCGGGGGTGCCGGGACTCCGGCCGCACTGCCGCCGCGATGCCGCCGCCATCACGGACTTCCTGTGGGACAAGCGCACGG  
GCCTCGCCGCCAGAACGATGCCCCATCCCCGAAGGTACCATTCCTCAGAGCGAGGTAGCCGGGGGAGTTACCACGAACACTATCAGAGC  
CGAAAGCATAAGCGAAGAAGAAGTTCGCTCCTGGTCAAGTAGCAGTGACCGGACAAGGCCGGCGGGAGGAGGACAGCTACCACGTTTCG  
GTCCCGAAGCAGTATGATGACCATTCGTCCGATCGGCGGCTGTACGATCGGCGGTACTGTGGCAGCTACAGGCGCAATGGCTACAGCCGGG  
ACAGAGGGGAGGCTTACTACGACACAGACTTTTCGGCAGTCTATGAATACCATCGAGAGAACAGCAGTTACCGAAGCCAGCGCAGCAGC  
CGAAGGAAACACAGAAGGCCGGAGGAGACGGAGCCGGACATTCAGCCGCTCATCTTACACAGCAGCCGGAGAGGCCAAGAGTGTAGAGGA  
CGACGCTGAGGGCCACCTCATCTACCACCTCGGGGACTGGCTACAAGAGCGATGAATTTGAAGCACCTTAGGAGAAGGGACCTTCG  
GCCGAGTTGTGCAGTGTGTGGACCATCGCAGGGGCGAACAAGTTGCCCTGAAGATCATTAAAGAATGTGGAGAAGTACAAGGAAGCA  
GCCCCGACTAGAAATCAACGTGCTGGAGAAAATCAATGAGAAAGATCCTGACAACCAGAACCTCTGTGTCCAGATGTTTGACTGGTTTGA  
CTACCATGGCCCCATGTGTATCTCCTTTGAGCTTCTGGGCTTAGCACCTTCGATTTCTCAAAGACAACAACACTACCTGCCCTACCCCA  
TCCACCAAGTGCGCCACATGGCCTTCAGCTCTGCCAGGCCGTCAAGTTCTCCATGATAACAAGTTGACACATACGGACCTCAAACCT

GAAAATATTCTGTTTGTGAATTACGACTACGAACTCACCTACAACCTAGAGAAGAAGCGAGATGAGCGCAGTGTAAGAGCACAGCCGT  
GCGGGTGGTGGACTTCGGCAGTGCCACCTTTGACCACGAACACCATAGCACCATTGTCTCCACTCGCCATTACCGAGCCCCCGAGGTCA  
TCCTGGAGTTGGGCTGGTACAGCCATGCGATGTATGGAGCATAGGCTGCATCATCTTTGAGTACTGCGTTGGCTTACCCTCTCCAG  
ACCCATGACAACAGAGAGCATCTAGCCATGATGGAAAGGATCCTGGGTCTGTCCCTTCTCGGATGATCAGAAAAGACAAGAAAACAGAA  
ATATTTTTATCGGGTTCGCCTGGATTGGGATGAGAACACCTCAGCCGGGCGCTACGTTCTGTGAGAAGTCAAACCTCTGCGGCGGCTGG  
GTGACTGCTCTGGTGGTGGTGGGATCCAAACCTGCCGTGGCGGTGCTCATGCTGCTCGTCCCTGCTCTTACCAGGCATCGCAGTGCT  
GGGAATCGTGATGCTGAAGCGGATCCACTCCCTGTACCGCCAAACGGGTGCCAGCTTTCAGAAGGCCAGCAAGAATTTGCTGCTGGTG  
TCTTCTCCAACCCTGCGGTTGCAACTGCTGCTGCCAATGCAGCTGCCGGAGCTGCTGAAAATGCCTTACGGGCCCTTGACCCCTGCTG  
CACCCGCTGGGATGCCCTGGGCTGTACCTGTGGGAACCAAGATAGTCCCTATCCCTGAAGTCTCTGGGATTCAGGGAGCCATCACCA  
CTTGGTGACTTCTATGGGGCTCTTCATTCCACAGCCATGACTTTAATCCTGACTTGAGGTGTGGAGAGCCCGCTGTGACTCAGTCATTA  
TTTGCCTTTTATCTCCCATCTGGCCACACTGCTGCCGCCACCTCTCACACAACCCCAACCCCAAGTTTCTTCTGCTGTGCCAAGGATGT  
CTTC

>TU54

AGATGGAACCGGAGCTGACCACGGGGAGAAGAGCGGTGTGGGAGCCCCAGACCCCGGGGCTGCACACGCTGAAGGGGAGCTCGTTCCCG  
AACCGGAGCAGGACTTCGGAGGGGACTCGGTGGCACCTCTAGACCTCGGGAAAGGGACTTCTCCTGGGGACCGAAGCCTCCCTTACTCT  
GCTTTCCCGGGCGGCGACACCGAATCCCTGTGCGGAGACCCCGGTGTCCAGACGAATGAGGAGCAGGAGAGGACCCGCCACGACACCGC  
GGGCTCAGCCATGGGTGACCCCGGAACCGAGAGCATCGCACCCGTGTGCCCTCCTTTACAGTGTAATCAGGACGAAGACTCCTTGACTT  
TGCTCATCCAAGTGCCTGGGATTCTGCCACAAACTCTTACCGGACATCTAAGCCCCGTGCGTTACGAATTGTGCTTCTCTACACAAGAC  
TCGGGTTATTCCTGCACTTTGCAGTTTGTCCAGAGAATAAGTTGAGTACCAGAGAACCCGAGACTAGCGTTTCTTTAAATAATGCAGT  
CATAGTACTGGCAAAATCTCCAGAGAGCCACGGACTTTGGCGAGAGTGGTATTGTGGCTTGAACAAGGAGTCTTTGGAGGAAAGATTGT  
TTATCAATGAAGAAAATGTTAATGGGTTTCTTGAAGAGGTCTTTGCTCCCCATTGAAGCAGGCAAGGTCTCTGGCCCCACCGCTGATT  
GAGGTTCTTACGGCCACTGATGAGCAGGTTGATCCATGCAGAGGTGGGGAAATGGCTGCCATAGGAAACTTCTCACCGATAACTAGA  
GTTTCCGGAAACAGTTCTCATCGCAGACACTTCTACTGCAAACATGGTCAACGTACCAAAAACCCGAAGGACTTTCTGTAAGAAATGTG  
GCAAGCATCAGCCTCACAAAGTGACCCAGTATAAGAAGGGCAAGGATTCCTGTATGCCCAAGGAAAGCGGCGCTACGATCGCAAGCAG  
AGTGGCTACGGTGGGCAGACAAAGCCAATCTTTCGAAAGAAGGCCAAAACCACAAAGAAGATTGTGCTCAGGCTTGAGTGTGTTGAGCC  
CAACTGCAGATCCAAGAGGATGCTGGCCATTAAGAGATGCAAGCATTTTGAAGTGGGAGGCGACAAGAAGAGGAAGGGC
