# Supplementary material for: Detailed characterization of the mouse embryonic stem cell transcriptome reveals novel genes and intergenic splicing associated with pluripotency
Source: PubMed Central journal article supplement (PMC2375908; doi:10.1186/1471-2164-9-155), 2008-04-09
Supplement: 1471-2164-9-155-S3.pdf [file 1471-2164-9-155-S3.pdf]

| TU | Nearest Oct4<br>ChIP-seq<br>(unpublished) | Nearest Oct4<br>ChIP-PET<br>(Loh et al.<br>2006) | Nearest Nanog<br>ChIP-seq<br>(unpublished) | Nearest Nanog<br>ChIP-PET<br>(Loh et al.<br>2006) | Nearest Sox2<br>ChIP-seq<br>(unpublished) | Nearest Sox2<br>ChIP-PET<br>(unpublished) |
|----|-------------------------------------------|--------------------------------------------------|--------------------------------------------|---------------------------------------------------|-------------------------------------------|-------------------------------------------|
| 4  | none                                      | none                                             | at TSS                                     | none                                              | none                                      | none                                      |
| 7  | ~27.5 kb<br>downstream                    | ~ 45 kb<br>upstream                              | ~27.5 kb<br>downstream                     | none                                              | none                                      | none                                      |
| 11 | none                                      | none                                             | ~62.5 kb<br>downstream                     | none                                              | none                                      | none                                      |
| 52 | intragenic                                | ~ 65 kb<br>downstream                            | at end of<br>transcript                    | none                                              | ~42.5 kb<br>downstream                    | ~42.5 kb<br>downstream                    |
| 54 | ~15 kb<br>downstream                      | none                                             | >5 kb upstream                             | none                                              | none                                      | none                                      |

Oct4, Nanog, and Sox2 binding sites in the vicinity of the five novel TUs selected for follow-up analysis, as assessed by ChIP-PET and ChIP-sequencing (Solexa) approaches
