# Supplementary material for: Detailed characterization of the mouse embryonic stem cell transcriptome reveals novel genes and intergenic splicing associated with pluripotency
Source: PubMed Central journal article supplement (PMC2375908; doi:10.1186/1471-2164-9-155), 2008-04-09
Supplement: 1471-2164-9-155-S4.pdf [file 1471-2164-9-155-S4.pdf]

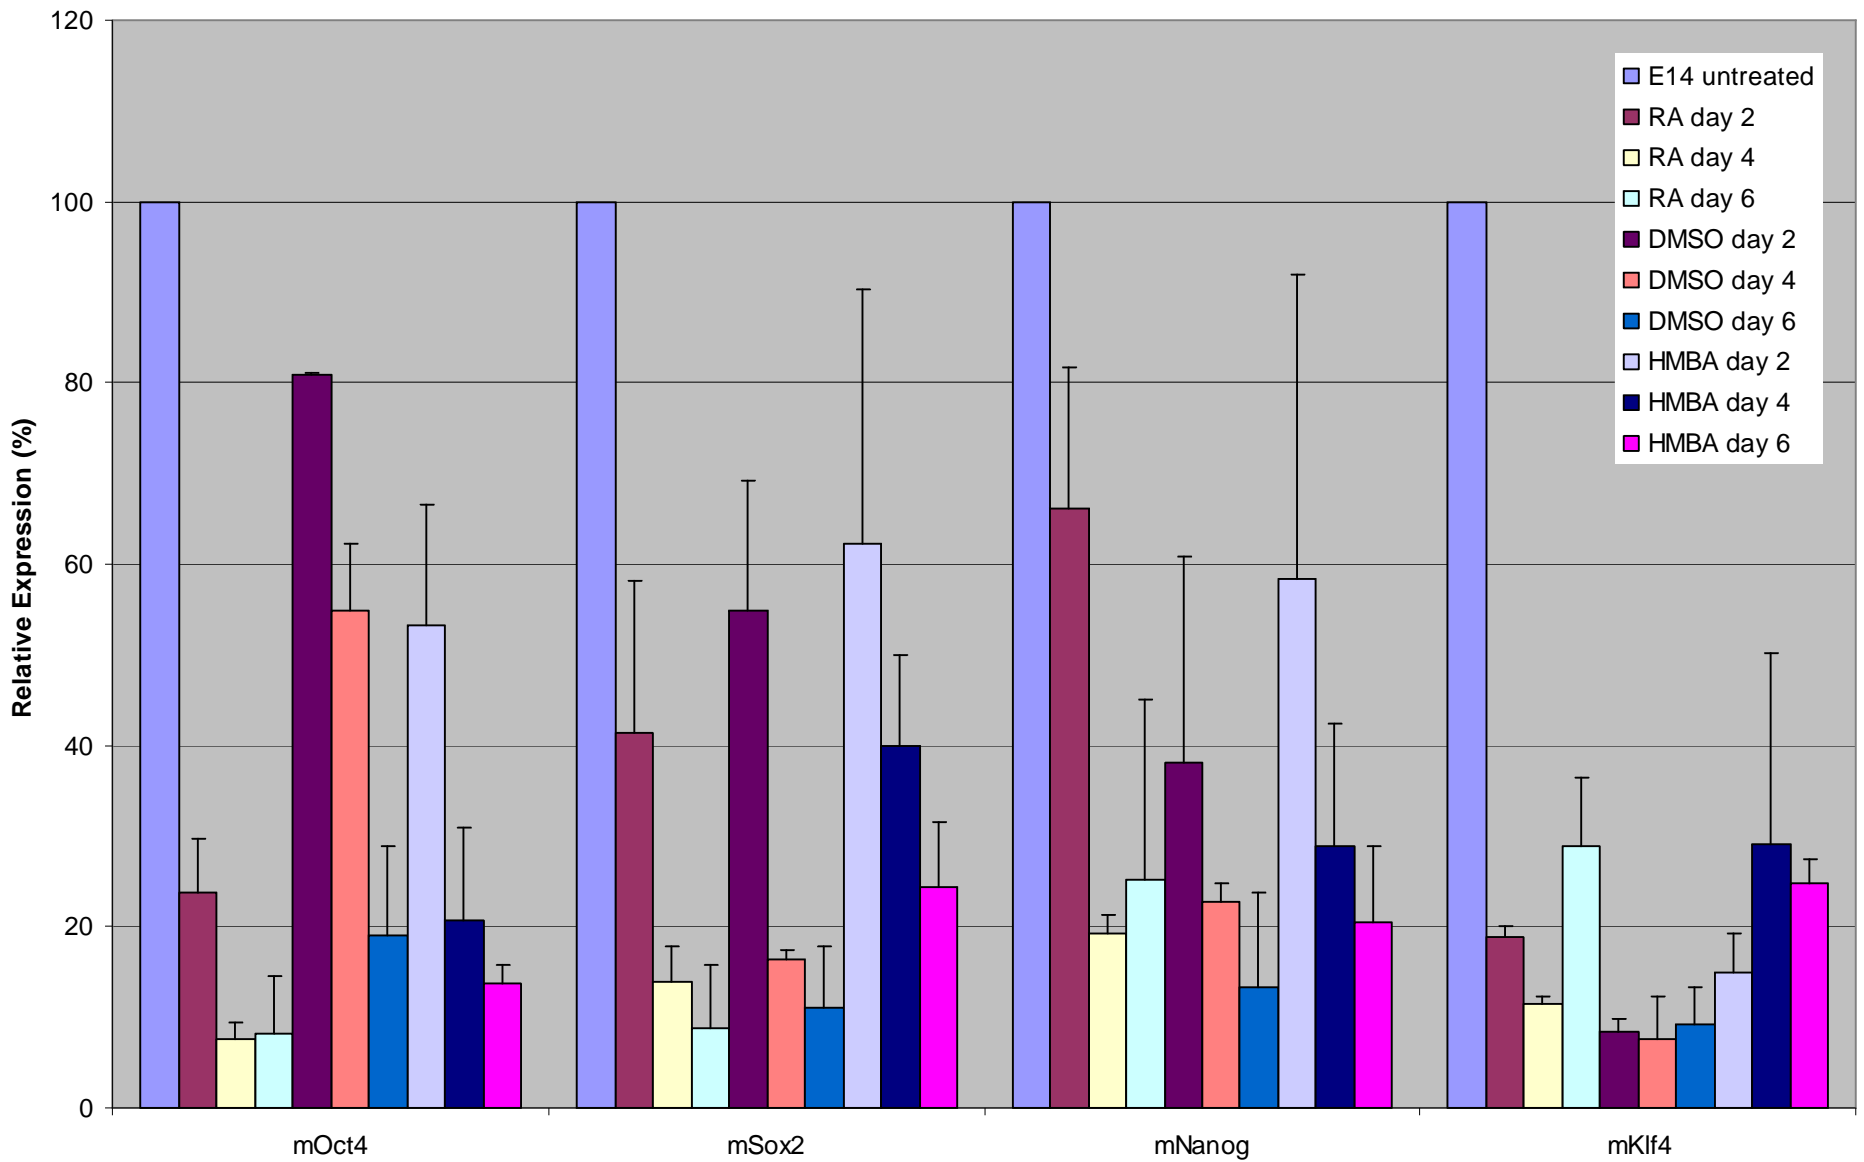

**Expression level of of pluripotency markers upon ES cell differentiation**
