# Supplementary material for: Detailed characterization of the mouse embryonic stem cell transcriptome reveals novel genes and intergenic splicing associated with pluripotency
Source: PubMed Central journal article supplement (PMC2375908; doi:10.1186/1471-2164-9-155), 2008-04-09
Supplement: 1471-2164-9-155-S5.pdf [file 1471-2164-9-155-S5.pdf]

| Name | Primer sequence                | Tm/<br>°C | Remarks               |
|------|--------------------------------|-----------|-----------------------|
| TU2  | ACTTAGTAACATTCCCTCAGCC         | 56.6      | Forward               |
|      | GACGTGAGCAGTCTCCAGAAA          | 60.6      | Reverse               |
| TU3  | GCAGCAGCACTCACCCACTGAG         | 59.5      | Forward               |
|      | GGGAGGAACTTTCCACTCCTAG         | 54.3      | Reverse               |
| TU4  | GTA CTGAAGTCTCTGGTCTCC         | 52.9      | Forward               |
|      | AGTCTAATGGCTTTATTGGATTA        | 54.2      | Reverse               |
|      | AGCTCATGCAGAAGTCCCAAG          | 61.9      | Real Time PCR Forward |
|      | TGCTCACCAAGCCAGACTTC           | 61.6      | Real Time PCR Reverse |
| TU6  | GGCTCAGGCTGTCTGAAAAG           | 60.1      | Forward               |
|      | TGGTCAATTTCTGAAGGTATGC         | 59.1      | Reverse               |
|      | GCTGTCTGAAAAGATGAAAAGG         | 60.2      | Nested Forward        |
|      | ATTTCTGAAGGTATGCTACACAATAG     | 57.3      | Nested Reverse        |
| TU7  | TAGTTCATGCTGTAGCTGAGG          | 59.5      | Forward               |
|      | GGGAGGTTACTCTCCAGTATG          | 56.1      | Reverse               |
|      | TGTCCTGCTTTGTATGCTACTGC        | 61.7      | Real Time PCR Forward |
|      | CCAGCATGACATCTTTGTAAAGTC       | 60.1      | Real Time PCR Reverse |
| TU8  | GCTGGCTATAAGTTCTCGAAGGC        | 55.5      | Forward               |
|      | CAGCTCCAGGTCCGCAGGGATC         | 63.7      | Reverse               |
| TU9  | AGATGTTTTCTTACCGCTCTG          | 56.3      | Forward               |
|      | TTGTTTTAATGCGTCTTTCACTC        | 51        | Reverse               |
|      | GTCCACGCCTGTAAAATTGG           | 60.4      | Nested Forward        |
| TU10 | GTCGGGAATACAGAAGAAAGAAT        | 50.4      | Forward               |
|      | GTGGCTTAGATTATCTGCACG          | 49.5      | Reverse               |
|      | TCCCTGCGAGTACACCTCTC           | 60.4      | Nested Forward        |
| TU11 | GCGGAAGCAAGTGAGAGATTTC         | 54.7      | Forward               |
|      | ATCCCAGAATGCTATTTGCAG          | 51.2      | Reverse               |
|      | AGCAAGTGAGAGATTTTCGACC         | 50.2      | Nested Forward        |
|      | TTTCCATAGCCTCAGTCACTTC         | 50.4      | Nested Reverse        |
|      | GTGCCATGGTGGTCAAGAAAAG         | 60.5      | TaqMan Forward        |
|      | GGCCAGGCTTGCTTAGTCT            | 59.6      | TaqMan Reverse        |
|      | CAGAGCCACAGCTCC                | 50.8      | TaqMan Probe          |
| TU12 | GACGCTGGGTCAAGATCGCCAC         | 62.5      | Forward               |
|      | TCGGTGTCTTACGCTTTATTT          | 52.6      | Reverse               |
| TU15 | AGTAGTGCCCTGAGGCGCCAG          | 60.2      | Forward               |
|      | TAGTTGAAGATACTTTAGTGATGGAAATTC | 54.9      | Reverse               |
| TU17 | GCTGGCTTTAGACAAAGCGGC          | 57.9      | Forward               |
|      | CAACACAAGGGTGACAAAGGA          | 52.4      | Reverse               |
|      | GCCACCGCCGCTCATCTGAAG          | 63.5      | Nested Forward        |
|      | AACCACATCCTCTCTGTCGGG          | 55.2      | Nested Reverse        |

|         |                           |      |                       |
|---------|---------------------------|------|-----------------------|
| TU52    | GTGGAACCGCACTTCGTC        | 60.3 | Forward               |
|         | GAAGACATCCTTGGCACAGC      | 60.8 | Reverse               |
|         | CGCTACGTTTCGTGAGAACTG     | 59.7 | Real Time PCR Forward |
|         | GGCTGAGCTTTCTTGAGGAC      | 59.2 | Real Time PCR Reverse |
| TU53    | ACTCTCCGCACCCTGCTC        | 62.9 | Forward               |
|         | GAAGAAGTTTGGAGTTCTTTATTGC | 59   | Reverse               |
| TU54    | AGATGGAACCGGAGCTGAC       | 60.2 | Forward               |
|         | GCCCTTCCTCTTCTTGTCG       | 59.9 | Reverse               |
|         | GCCACTGATGAGCAGGTTTCAG    | 63.3 | Real Time PCR Forward |
|         | CGTTGACCATGTTTGCAGTAG     | 59.3 | Real Time PCR Reverse |
| TU55    | CAGATTTCTGTGGAGTAAGGAC    | 59.2 | Forward               |
|         | ACCGACTAGGTTGGGTTGAC      | 58.9 | Reverse               |
| ActB    | TACAGCTTCACCACCACAGC      | 59.9 | Real Time PCR Forward |
|         | AGTTTCATGGATGCCACAGG      | 60.9 | Real Time PCR Reverse |
| Slc10a3 | CTTCATCAGCGAGATTCAAGG     | 60   | Real Time PCR Forward |
|         | ACTGCTGGGAGCTACCTCTG      | 59.6 | Real Time PCR Reverse |
| Ubl4    | TGGTCTCGGATAAGCTGAATG     | 60.2 | Real Time PCR Forward |
|         | CCAGGACTTTGGAGATCAGC      | 59.8 | Real Time PCR Reverse |
| M13-F   | GTAAAACGACGGCCAG          | 50   | Forward               |
| M13-R   | CAGGAAACAGCTATGAC         | 50   | Reverse               |

Primer sequences used to characterize the TUs identified in this study
