# Supplementary material for: Detailed characterization of the mouse embryonic stem cell transcriptome reveals novel genes and intergenic splicing associated with pluripotency
Source: PubMed Central journal article supplement (PMC2375908; doi:10.1186/1471-2164-9-155), 2008-04-09
Supplement: 1471-2164-9-155-S6.pdf [file 1471-2164-9-155-S6.pdf]

| <b>Tissue Type</b> | <b>Catalog No.</b> |
|--------------------|--------------------|
| 7-day Embryo       | 636607             |
| 11-day Embryo      | 636608             |
| 15-day Embryo      | 636609             |
| 17-day Embryo      | 636610             |
| Brain (whole)      | 636601             |
| Colon              | 636669             |
| Heart              | 636602             |
| Kidney             | 636612             |
| Liver              | 636603             |
| Lung               | 636604             |
| Ovary              | 636671             |
| Skeletal Muscle    | 636673             |
| Spleen             | 636605             |
| Stomach            | 636617             |
| Testis             | 636606             |
| Thymus             | 636618             |

Catalog numbers of mouse total RNA (BD Biosciences Clontech) used in the multi-tissue panel expression analysis
