# Supplementary material for: Detailed characterization of the mouse embryonic stem cell transcriptome reveals novel genes and intergenic splicing associated with pluripotency
Source: PubMed Central journal article supplement (PMC2375908; doi:10.1186/1471-2164-9-155), 2008-04-09
Supplement: 1471-2164-9-155-S7.pdf [file 1471-2164-9-155-S7.pdf]

| <b>Gene Symbol</b> | <b>Lineage</b> | <b>ABI TaqMan Gene Expression Assay ID</b> |
|--------------------|----------------|--------------------------------------------|
| Sox17              | Endodermal     | Mm00488363_m1                              |
| Gata4              | Endodermal     | Mm00484689_m1                              |
| Gata6              | Endodermal     | Mm00802636_m1                              |
| Foxa2              | Endodermal     | Mm00839704_mH                              |
| Afp                | Endodermal     | Mm00431715_m1                              |
| Gata2              | Mesodermal     | Mm00492300_m1                              |
| Nkx2.5             | Mesodermal     | Mm00657783_m1                              |
| T-brachyury        | Mesodermal     | Mm00436876_g1                              |
| MyoD               | Mesodermal     | Mm00440387_m1                              |
| Hand1              | Mesodermal     | Mm00433931_m1                              |
| Bmp4               | Mesodermal     | Mm00432087_m1                              |
| Fgf5               | Ectodermal     | Mm00438919_m1                              |
| Nestin             | Ectodermal     | Mm00450205_m1                              |
| Sox1               | Ectodermal     | Mm00486299_s1                              |
| Sox4               | Ectodermal     | Mm00486317_s1                              |
| Pax6               | Ectodermal     | Mm00443072_m1                              |
| Pax7               | Ectodermal     | Mm00834079_m1                              |
| Rest               | Ectodermal     | Mm00803268_m1                              |
| Oct4               | Pluripotency   | Mm00658129_gH                              |
| Sox2               | Pluripotency   | Mm00488369_s1                              |
| Nanog              | Pluripotency   | Mm01617762_g1                              |
| Klf4               | Pluripotency   | Mm00516104_m1                              |
| ActB               | Control        | Mm00607939_s1                              |

Catalog numbers of TaqMan probes (Applied Biosystems) used in the QRT-PCR
