# Supplementary material for: Detailed characterization of the mouse embryonic stem cell transcriptome reveals novel genes and intergenic splicing associated with pluripotency
Source: PubMed Central journal article supplement (PMC2375908; doi:10.1186/1471-2164-9-155), 2008-04-09
Supplement: 1471-2164-9-155-S8.pdf [file 1471-2164-9-155-S8.pdf]

| Target | siRNA Target Sequences |
|--------|------------------------|
| TU4    | CGAAACGAGCCGUGUUCUA    |
|        | CUUCCGAGGAGCCGUUAAA    |
|        | AGGAGCCGUUAAACCAAUA    |
|        | GGAGCCGUUAAACCAAUAU    |
| TU7    | CAGUGUCAUAAGUCAUUUA    |
|        | CGACUACAUGAAAGAAUAU    |
|        | GAAUGAAAUCAAUUGUGGUA   |
|        | GGAAAGAUCAUAACAUUGA    |
| TU11   | GCCCAGGUGGUGGACUCUA    |
|        | GCCACAGCUCCCAGACUAA    |
| TU52   | ACCUCUGCGGGACCCAGCU    |
| TU54   | GGAAACAGUUCUCAUCGCA    |

Sequences of the custom siRNA (Dharmacon) designed against the TUs
